# Supplementary material for: Quantitative rationalization of the unexpectedly moderate water wettability of poly(vinyl alcohol) surfaces: thermodynamic evaluation and prediction of surface hydrogen bonding
Source: Royal Society of Chemistry journal article supplement (doi:10.1039/d4sm01524j), 2025-01-01
Supplement: d4sm01524j1.pdf [file d4sm01524j1.pdf]

**Supplementary Information for “Quantitative rationalization of unexpectedly moderate water wettability on poly (vinyl alcohol) surfaces: Thermodynamic Evaluation and Prediction of Surface Hydrogen Bonding”**

Zhuohuan Guo, Zhuoyuan Ma\* and Dayang Wang\*

State Key Laboratory for Inorganic Synthesis and Preparative Chemistry, College of Chemistry, Jilin University, 130012, Changchun, China

\* Corresponding authors. E-mail: wangdayang@jlu.edu.cn, mzyjlu@163.com

## Table of Contents:

1. The original SFG spectra of as-prepared  $L\_PVA_2^{140}$  thin films before and after 80 cycles of abrasion (Figure S1).
2. The original UV-Vis spectra (Figure S2, Figure S8).
3. The original AFM images (Figure S3).
4. The original XPS spectra (Figure S4).
5. The original ATR-FTIR spectra (Figure S5, Figure S6, Figure S9).
6. The original SEM images (Figure S7).
7. Summary of the fitting parameters of ATR-FTIR spectra on  $L\_PVA_2^T$ ,  $H\_PVA_2^{80}$ ,  $L\_PVA_7^{RT}$  and  $M\_PVA_G^{RT}$  thin films (Table S1).
8. Bootstrapping Validation of  $\gamma_t^{s,p^*}$  and  $\gamma_g^{s,p^*}$  values.

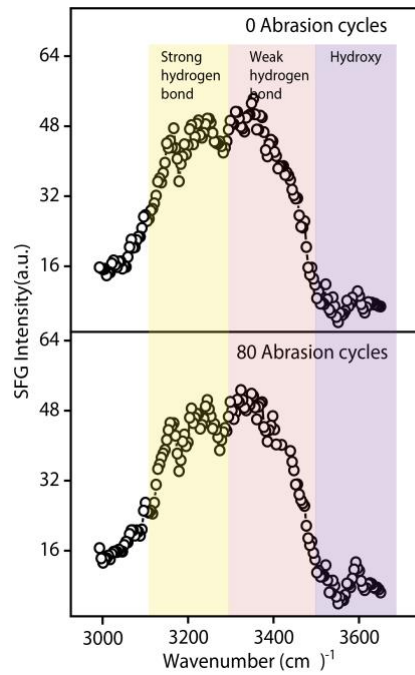

**Figure S1.** SFG spectra of as-prepared  $L\_PVA_2^{140}$  thin films before and after 80 cycles of abrasion.

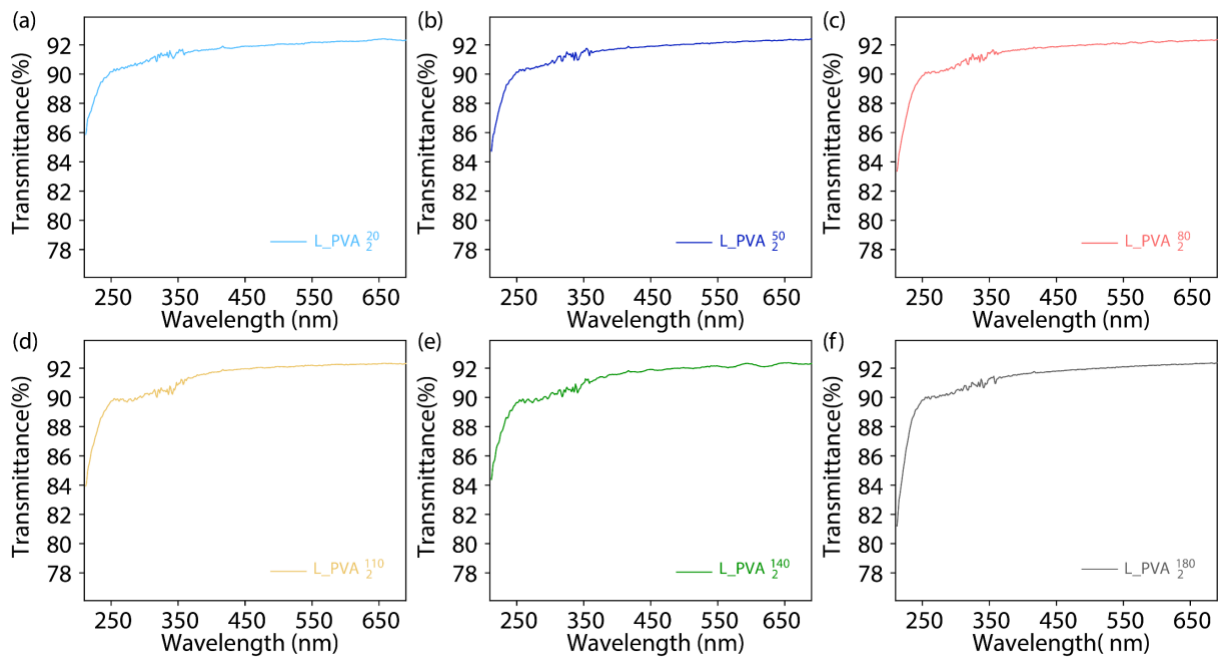

**Figure S2.** (a-f) UV-Vis spectra of as-prepared  $L\_PVA_2^{20}$ ,  $L\_PVA_2^{50}$ ,  $L\_PVA_2^{80}$ ,  $L\_PVA_2^{110}$ ,  $L\_PVA_2^{140}$  and  $L\_PVA_2^{180}$  thin films in the wavelength range of 200-700 nm, respectively.

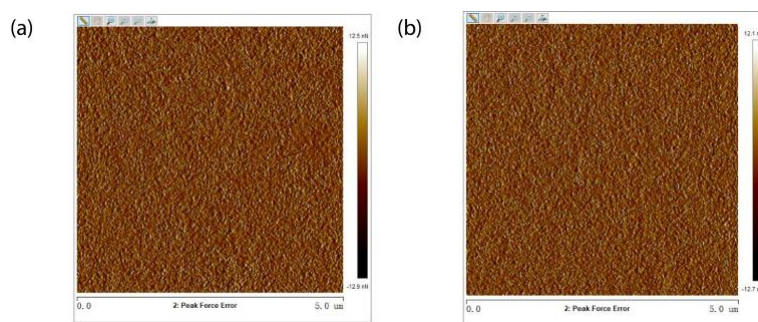

**Figure S3.** AFM images of as-prepared L\_PVA<sub>2</sub><sup>20</sup> (a) and L\_PVA<sub>2</sub><sup>180</sup> (b) thin films.

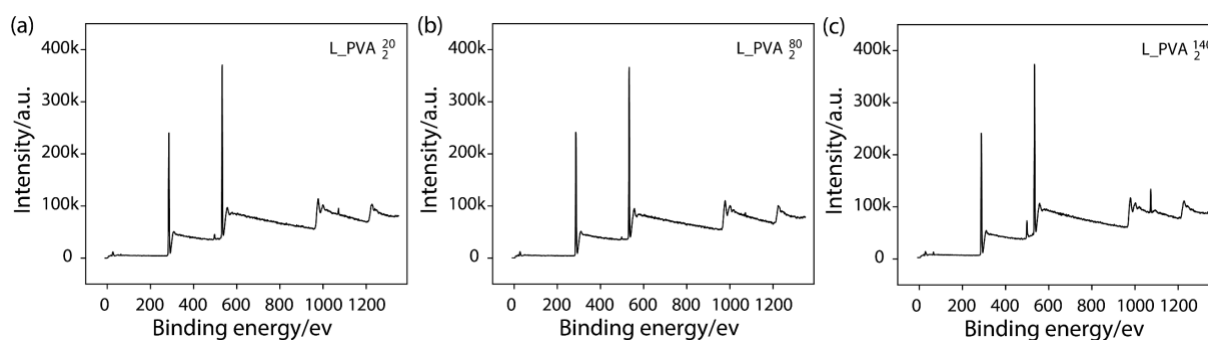

**Figure S4.** High-resolution XPS spectra of the survey signals of L\_PVA<sub>2</sub><sup>20</sup> (a), L\_PVA<sub>2</sub><sup>80</sup> (b), and L\_PVA<sub>2</sub><sup>140</sup> thin films (c).

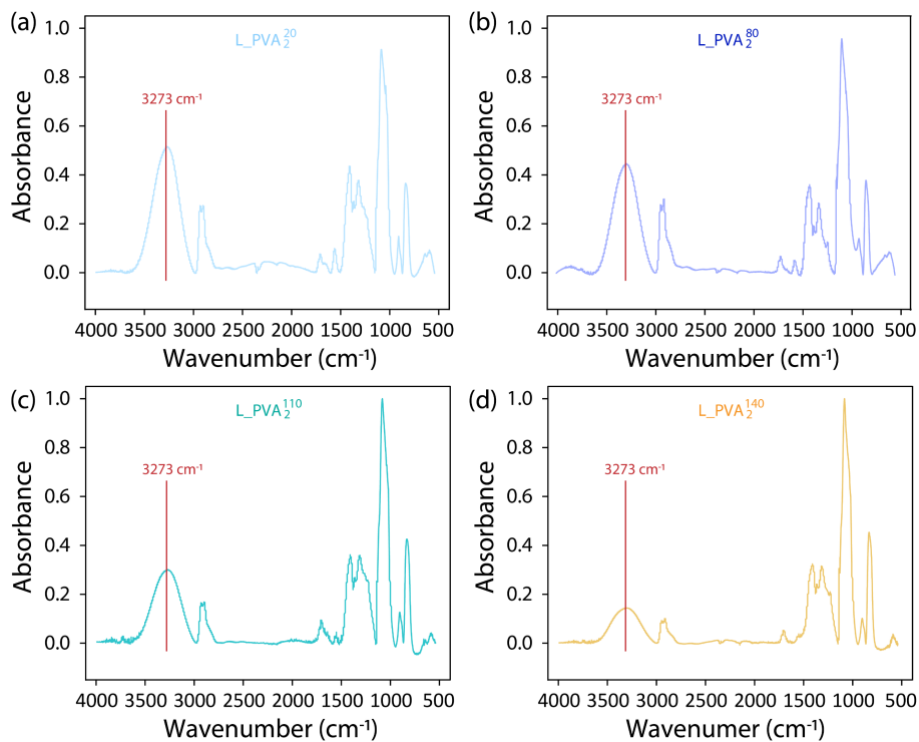

**Figure S5.** (a-d) ATR-FTIR spectra of as-prepared L\_PVA<sub>2</sub><sup>20</sup>, L\_PVA<sub>2</sub><sup>80</sup>, L\_PVA<sub>2</sub><sup>110</sup>, and L\_PVA<sub>2</sub><sup>140</sup> thin films in the range of 4000-400 cm<sup>-1</sup>, respectively.

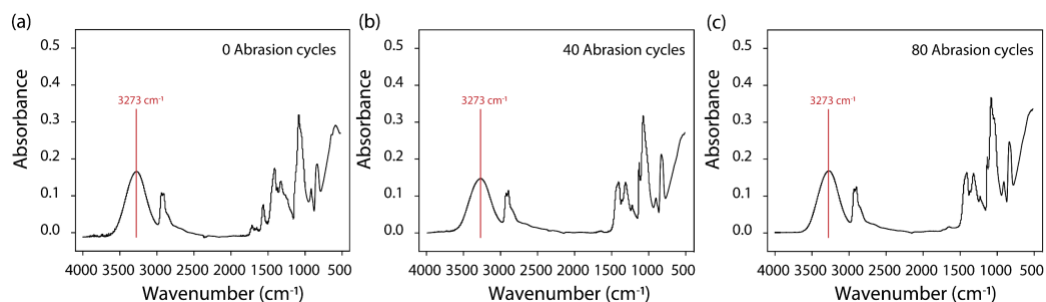

**Figure S6.** (a-c) ATR-FTIR spectra of as-prepared  $L\_PVA_2^{140}$  thin films after their surfaces are subjected to 0, 40 and 80 cycles of abrasion, respectively.

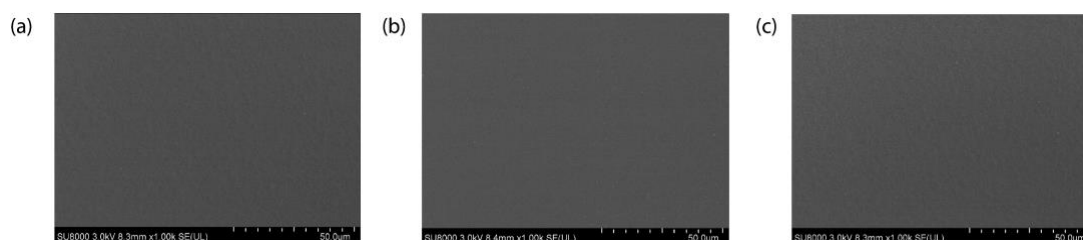

**Figure S7.** (a-c) SEM images of as-prepared  $H\_PVA_2^{80}$ ,  $L\_PVA_7^{RT}$ , and  $M\_PVA_G^{RT}$  films, respectively.

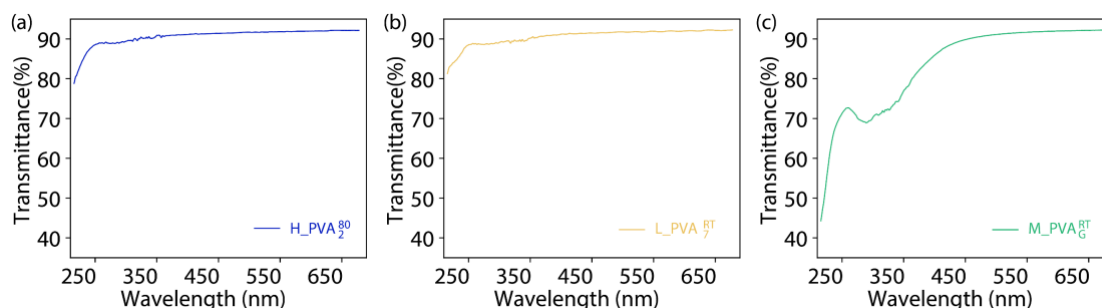

**Figure S8.** (a-c) UV-Vis spectra of as-prepared  $H\_PVA_2^{80}$ ,  $L\_PVA_7^{RT}$ , and  $M\_PVA_G^{RT}$  films in the wavelength range of 200-700 nm, respectively.

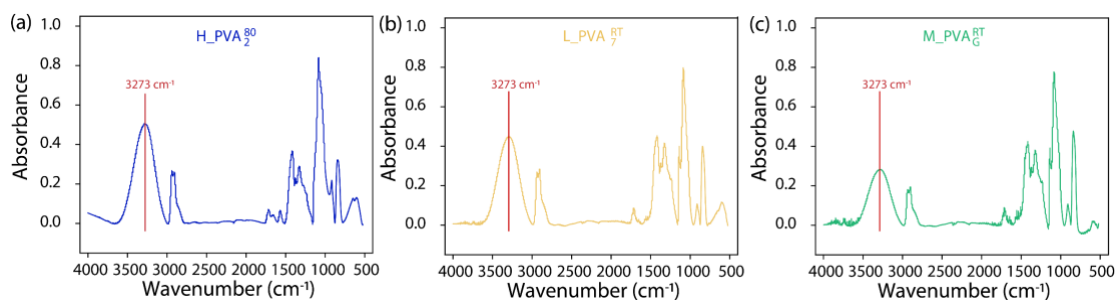

**Figure S9.** (a-c) ATR-FTIR spectra of  $H\_PVA_2^{80}$ ,  $L\_PVA_7^{RT}$ , and  $M\_PVA_G^{RT}$  films in the range of 4000-400  $cm^{-1}$ , respectively.

**Table S1.** Summary of the fitting parameters of ATR-FTIR spectra on  $L\_PVA_2^T$ ,  $H\_PVA_2^{80}$ ,  $L\_PVA_7^{RT}$  and  $M\_PVA_G^{RT}$  thin films.

| $L\_PVA_2^T$     | $OH_t$ group   |                 |           |                 | $OH_g$ group   |                 |           |                 | $R^2$  |
|------------------|----------------|-----------------|-----------|-----------------|----------------|-----------------|-----------|-----------------|--------|
|                  | peak position  | Standard errors | peak area | Standard errors | peak position  | Standard errors | peak area | Standard errors |        |
| $L\_PVA_2^{20}$  | 3222 $cm^{-1}$ | 2.4 $cm^{-1}$   | 59.5      | 3.0             | 3356 $cm^{-1}$ | 3.3 $cm^{-1}$   | 41.7      | 3.0             | 0.9937 |
| $L\_PVA_2^{80}$  | 3222 $cm^{-1}$ | 1.9 $cm^{-1}$   | 50.5      | 1.9             | 3356 $cm^{-1}$ | 2.2 $cm^{-1}$   | 39.6      | 1.9             | 0.9981 |
| $L\_PVA_2^{110}$ | 3222 $cm^{-1}$ | 2.3 $cm^{-1}$   | 37.1      | 1.5             | 3356 $cm^{-1}$ | 2.7 $cm^{-1}$   | 30.0      | 1.5             | 0.9951 |
| $L\_PVA_2^{140}$ | 3222 $cm^{-1}$ | 2.0 $cm^{-1}$   | 22.7      | 0.6             | 3356 $cm^{-1}$ | 2.2 $cm^{-1}$   | 42.5      | 0.6             | 0.9959 |
| $H\_PVA_2^{80}$  | 3222 $cm^{-1}$ | 2.6 $cm^{-1}$   | 56.5      | 3.8             | 3356 $cm^{-1}$ | 3.0 $cm^{-1}$   | 54.0      | 4.6             | 0.9962 |
| $L\_PVA_7^{RT}$  | 3222 $cm^{-1}$ | 5.0 $cm^{-1}$   | 49.8      | 4.7             | 3356 $cm^{-1}$ | 4.0 $cm^{-1}$   | 46.6      | 4.8             | 0.9953 |
| $M\_PVA_G^{RT}$  | 3222 $cm^{-1}$ | 2.7 $cm^{-1}$   | 28.5      | 3.7             | 3356 $cm^{-1}$ | 3.5 $cm^{-1}$   | 24.7      | 2.7             | 0.9970 |

Bootstrapping Validation of  $\gamma_t^{s,p^*}$  and  $\gamma_g^{s,p^*}$  values.

Based on the determination method for  $\gamma_t^{s,p^*}$  and  $\gamma_g^{s,p^*}$  values reported in Section 3.3, Line 24, and the data listed in Table 1 (at least three sets), we applied the multivariable linear regression model in Origin to fit Equation 13 and obtained the following values that satisfy the condition:  $0 \text{ mN/m} < \gamma_t^{s,p^*}$  and  $\gamma_g^{s,p^*} < 50 \text{ mN/m}$ :

$$\text{For } \gamma_t^{s,p^*}: (x_1 = 6.2 \text{ mN/m}, x_2 = 8.4 \text{ mN/m}, x_3 = 8.0 \text{ mN/m})$$

$$\text{For } \gamma_g^{s,p^*}: (x_1 = 9.0 \text{ mN/m}, x_2 = 8.5 \text{ mN/m}, x_3 = 9.8 \text{ mN/m})$$

The 95% confidence intervals for  $\gamma_t^{s,p^*}$  and  $\gamma_g^{s,p^*}$  were calculated using Equation (13), resulting in the following:  $\gamma_t^{s,p^*}$  95% CI:  $7.5 \pm 1.5 \text{ mN/m}$ ;  $\gamma_g^{s,p^*}$  95% CI:  $9.1 \pm 1.2 \text{ mN/m}$ . The confidence interval formula is described as follows:

$$CI = \bar{x} \pm t \times \frac{SD}{\sqrt{n}} \quad (S1)$$

where  $\bar{x}$  is the sample mean,  $t$  is the critical value from the t-distribution (2.3534),  $SD$  is the standard deviation, and  $n$  is the sample size.
